# Supplementary material for: Development of a simple binary response questionnaire to identify airflow obstruction in a smoking population in Argentina
Source: PubMed Central journal article supplement — Eur Respir Rev. 2015 Jun;24(136):320–6. doi: 10.1183/16000617.00005214 (PMC9487816; doi:10.1183/16000617.00005214), 2015-06
Supplement: ERR-0052-2014_Garcia.pdf [file ERR-0052-2014_Garcia.pdf]

To view the full contents of this document, you need a later version of the PDF viewer. You can upgrade to the latest version of Adobe Reader from [www.adobe.com/products/acrobat/readstep2.html](http://www.adobe.com/products/acrobat/readstep2.html)

For further support, go to [www.adobe.com/support/products/acrreader.html](http://www.adobe.com/support/products/acrreader.html)
